# Supplementary material for: One-step nano-engineering of dispersed Ag–ZnO nanoparticles' hybrid in reduced graphene oxide matrix and its superior photocatalytic property
Source: Royal Society of Chemistry journal article supplement (doi:10.1039/c3ce41043a), 2013-01-01
Supplement: c3ce41043a.pdf [file c3ce41043a.pdf]

## Supplementary Information

# One-step nano-engineering of dispersed Ag/ZnO nanoparticles' hybrid in reduced graphene oxide matrix and its superior photocatalytic property

*Sanjit sarkar and Durga Basak*

*Department of Solid State Physics*

*Indian Association for the Cultivation of Science*

*Jadavpur, Kolkata-700032*

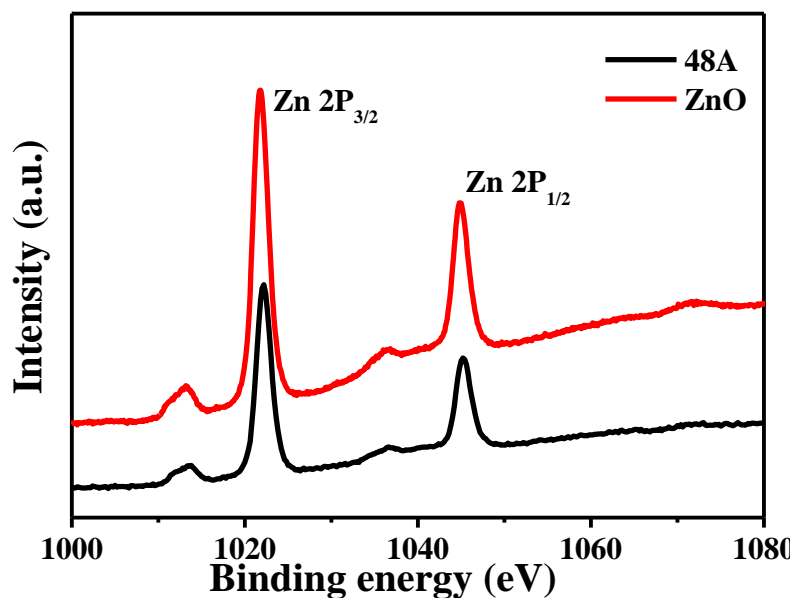

**Fig. S1:** XPS spectra of Zn 2P peak of the samples

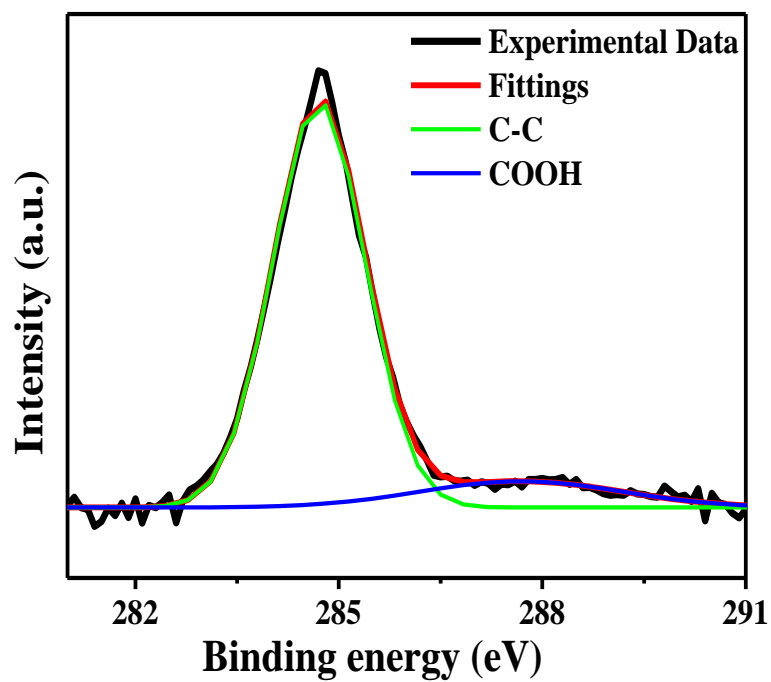

**Fig. S2:** XPS spectra of C 1S peak of the sample 48A after photocatalytic reaction.
